# Supplementary material for: Supramolecular networks in organic–inorganic hybrid materials from perchlorometalate(ii) salts and 2,4,5-tri(4-pyridyl)imidazole
Source: Royal Society of Chemistry journal article supplement (doi:10.1039/c2ce25476j), 2012-01-01
Supplement: c2ce25476j.pdf [file c2ce25476j.pdf]

## Electronic Supplementary Information for:

### Supramolecular Networks in Organic-Inorganic Hybrid Materials from Perchlorometalate(II) Salts and 2,4,5-Tri(4-pyridyl)imidazole.

Adriana Cruz Enríquez,<sup>a</sup> Marelly G. Figueroa Pérez,<sup>a</sup> Jorge L. Almaral Sánchez,<sup>a</sup> Herbert Höpfl,<sup>b</sup> Miguel Parra-Hake<sup>c</sup> and José J. Campos-Gaxiola.<sup>\*a</sup>

<sup>a</sup>Facultad de Ingeniería Mochis, Universidad Autónoma de Sinaloa. Fuente de Poseidón y Prol. Ángel Flores, Los Mochis, Sinaloa C. P. 81223.

<sup>b</sup>Centro de Investigaciones Químicas, Universidad Autónoma del Estado de Morelos, Av. Universidad 1001, Cuernavaca 62209.

<sup>c</sup>Centro de Graduados e Investigación del Instituto Tecnológico de Tijuana, Apartado Postal 1166, 22500 Tijuana, B. C. México.

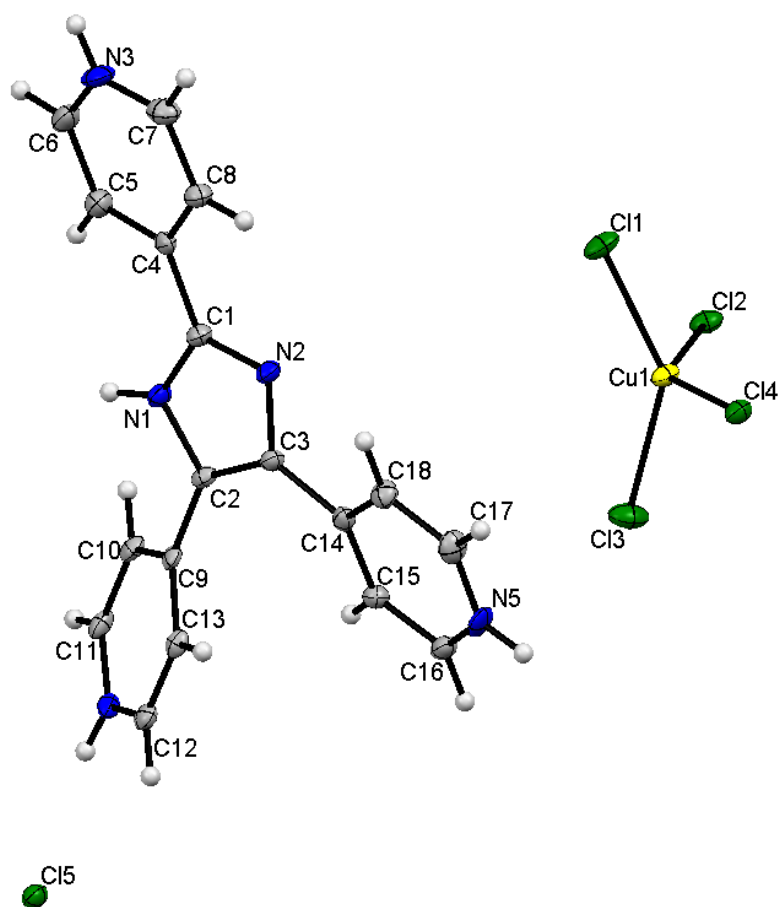

**Figure S1.** ORTEP diagram showing the structure of compound **1** with thermal ellipsoids at the 50% probability level and the atom-labeling scheme.

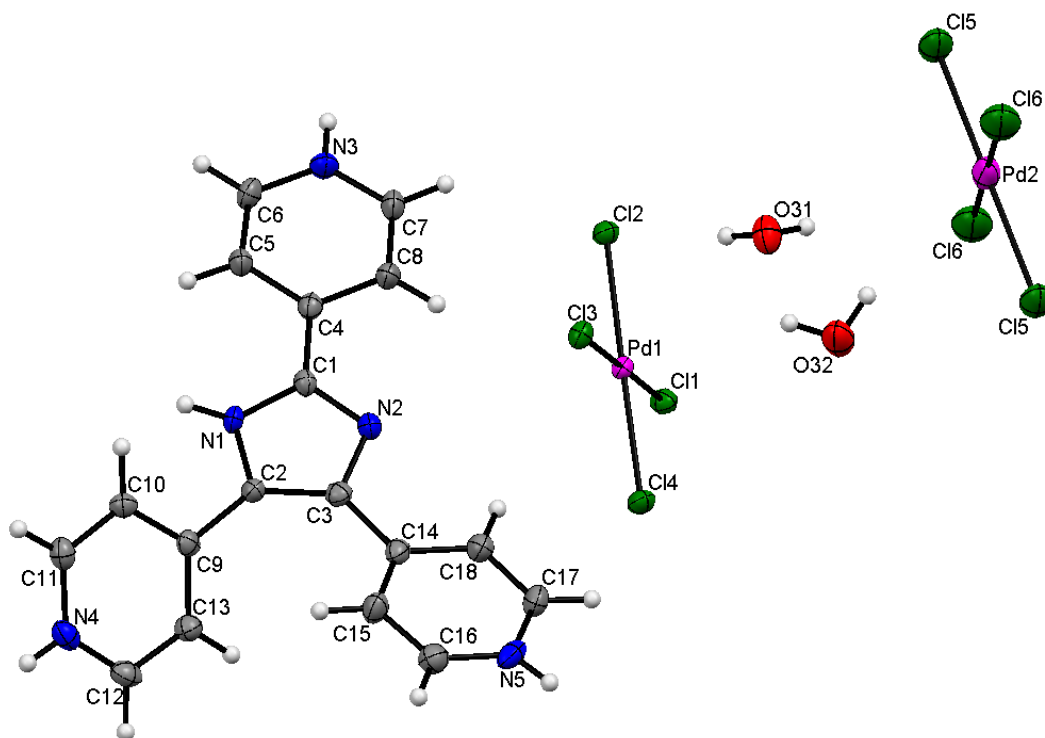

**Figure S2.** ORTEP diagram showing the structure of compound **2** with thermal ellipsoids at the 50% probability level and the atom-labeling scheme.

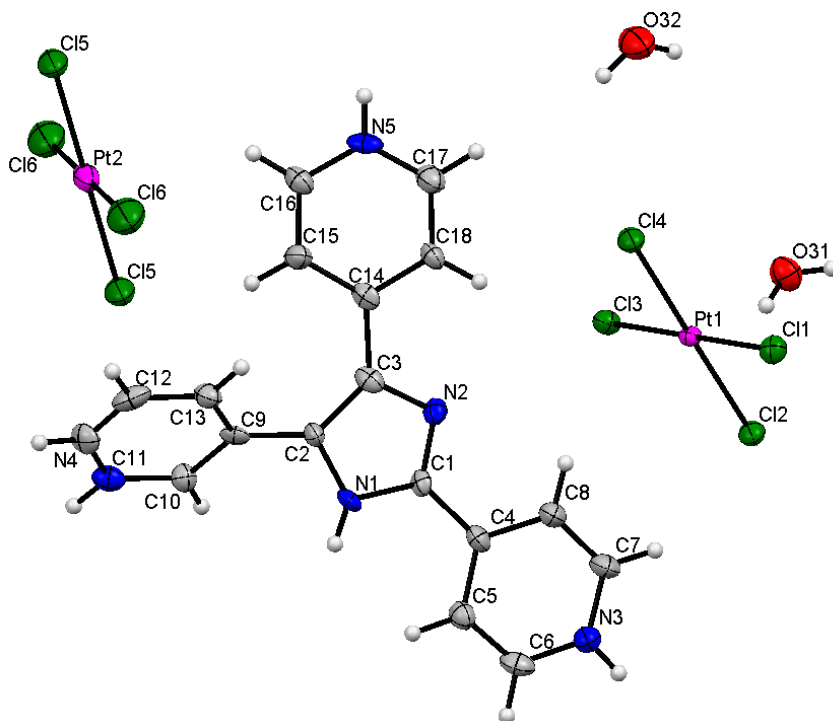

**Figure S3.** ORTEP diagram showing the structure of compound **3** with thermal ellipsoids at the 50% probability level and the atom-labeling scheme.

**Table S1.** Select bond lengths (Å) and bond angles (°) for the description of the coordination geometries of the copper, palladium and platinum atoms in compounds **1-3**<sup>a</sup>, respectively.

| <b>1</b>          |            |                       |            |
|-------------------|------------|-----------------------|------------|
| Cu(1)-Cl(1)       | 2.2512(8)  | Cl(3)-Cu(1)-Cl(1)     | 141.09(4)  |
| Cu(1)-Cl(2)       | 2.2724(9)  | Cl(3)-Cu(1)-Cl(4)     | 97.71(3)   |
| Cu(1)-Cl(3)       | 2.2294(9)  | Cl(3)-Cu(1)-Cl(2)     | 97.58(3)   |
| Cu(1)-Cl(4)       | 2.2643(8)  | Cl(4)-Cu(1)-Cl(2)     | 135.87(3)  |
| Cl(1)-Cu(1)-Cl(2) | 96.30(3)   |                       |            |
| Cl(1)-Cu(1)-Cl(4) | 97.15(3)   |                       |            |
| <b>2</b>          |            |                       |            |
| Pd(1)-Cl(1)       | 2.3054(10) | Cl(4)-Pd(1)-Cl(2)     | 178.53(4)  |
| Pd(1)-Cl(2)       | 2.3114(9)  | Cl(4)-Pd(1)-Cl(3)     | 89.80(4)   |
| Pd(1)-Cl(3)       | 2.2986(10) | Cl(6)-Pd(2)-Cl(6)#1   | 180.0      |
| Pd(1)-Cl(4)       | 2.2937(11) | Cl(6)-Pd(2)-Cl(5)#1   | 88.80(4)   |
| Pd(2)-Cl(5)       | 2.3202(10) | Cl(6)#1-Pd(2)-Cl(5)#1 | 91.20(4)   |
| Pd(2)-Cl(5)#1     | 2.3202(10) | Cl(6)-Pd(2)-Cl(5)     | 91.20(4)   |
| Pd(2)-Cl(6)       | 2.2753(13) | Cl(6)#1-Pd(2)-Cl(5)   | 88.80(4)   |
| Pd(2)-Cl(6)#1     | 2.2753(13) | Cl(5)-Pd(2)-Cl(5)#1   | 180.0      |
| Cl(1)-Pd(1)-Cl(2) | 88.65(3)   |                       |            |
| Cl(3)-Pd(1)-Cl(1) | 179.56(3)  |                       |            |
| Cl(3)-Pd(1)-Cl(2) | 91.63(3)   |                       |            |
| Cl(4)-Pd(1)-Cl(1) | 89.93(3)   |                       |            |
| <b>3</b>          |            |                       |            |
| Pt(1)-Cl(1)       | 2.306(3)   | Cl(4)-Pt(1)-Cl(2)     | 178.52(11) |
| Pt(1)-Cl(2)       | 2.312(3)   | Cl(4)-Pt(1)-Cl(3)     | 89.55(10)  |
| Pt(1)-Cl(3)       | 2.304(3)   | Cl(5)#2-Pt(2)-Cl(5)   | 180.0(2)   |
| Pt(1)-Cl(4)       | 2.301(3)   | Cl(6)-Pt(2)-Cl(6)#2   | 180.0(2)   |
| Pt(2)-Cl(5)       | 2.318(3)   | Cl(6)-Pt(2)-Cl(5)#2   | 88.62(13)  |
| Pt(2)-Cl(5)#2     | 2.318(3)   | Cl(6)#2-Pt(2)-Cl(5)#2 | 91.38(13)  |
| Pt(2)-Cl(6)       | 2.278(5)   | Cl(6)-Pt(2)-Cl(5)     | 91.38(13)  |
| Pt(2)-Cl(6)#2     | 2.278(5)   | Cl(6)#2-Pt(2)-Cl(5)   | 88.62(13)  |
| Cl(1)-Pt(1)-Cl(2) | 88.46(10)  |                       |            |
| Cl(3)-Pt(1)-Cl(1) | 179.48(11) |                       |            |
| Cl(3)-Pt(1)-Cl(2) | 91.92(10)  |                       |            |
| Cl(4)-Pt(1)-Cl(1) | 90.07(10)  |                       |            |

<sup>a</sup>Symmetrycodes: (#1) 1-x, -y+1, -z+2; (#2) 1-x, -y+1, -z

**Table S2.** Geometrical parameters for the hydrogen bonding interactions in the crystal structures of compounds **1-3**.

| Compound       | D-H...A       | D-H/Å        | H...A/Å | D...A/Å  | D-H...A/° | Symmetry operation for A |
|----------------|---------------|--------------|---------|----------|-----------|--------------------------|
| <b>1</b>       | N1-H1'...Cl5  | 0.84         | 2.25    | 3.077(3) | 167       | 1+x,y,z                  |
|                | N3-H3'...Cl4  | 0.84         | 2.32    | 3.116(3) | 158       | 2+x,y,z                  |
|                | N4-H4'...Cl5  | 0.84         | 2.26    | 3.038(3) | 153       | 1-x,1-y,1-z              |
|                | N5-H5'...Cl2  | 0.84         | 2.28    | 3.098(3) | 165       | -x,-1/2+y,1/2-z          |
|                | C5-H5...Cl5   | 0.95         | 2.82    | 3.579(3) | 137       | 1+x,y,z                  |
|                | C6-H6...Cl3   | 0.95         | 2.75    | 3.680(4) | 168       | 2+x,y,z                  |
|                | C7-H7...Cl5   | 0.95         | 2.67    | 3.415(4) | 136       | 1-x,1-y,1-z              |
|                | C8-H8...Cl3   | 0.95         | 2.71    | 3.612(3) | 160       | -x,-1/2+y,1/2-z          |
|                | C11-H11...Cl1 | 0.95         | 2.82    | 3.649(3) | 147       | 1-x,1/2+y,1/2-z          |
|                | C11-H11...Cl4 | 0.95         | 2.65    | 3.380(3) | 134'      | 1-x,1/2+y,1/2-z          |
|                | C13-H13...Cl2 | 0.95         | 2.78    | 3.533(3) | 137       | 1+x,1/2-y,1/2+z          |
|                | C16-H16...Cl2 | 0.95         | 2.69    | 3.468(3) | 140       | x,1/2-y,1/2+z            |
|                | <b>2</b>      | N1-H1'...Cl1 | 0.84    | 2.50     | 3.330(4)  | 174                      |
| N3-H3'...O32   |               | 0.84         | 1.88    | 2.657(5) | 155       | -1+x,-1+y,z              |
| N4-H4'...Cl1   |               | 0.84         | 2.432   | 3.194(3) | 151       | 1+x,y,1+z                |
| N4-H4'...Cl2   |               | 0.84         | 2.79    | 3.416(4) | 132       | 1+x,y,1+z                |
| N5-H5'...Cl3   |               | 0.84         | 2.35    | 3.163(4) | 162       | 1-x,1-y,1-z              |
| O31-H31A...Cl5 |               | 0.84         | 2.38    | 3.218(3) | 175       | -x,-y,1-z                |
| O31-H31B...Cl2 |               | 0.84         | 2.56    | 3.402(3) | 176       | 1+x,y,z                  |
| O32-H32A...Cl6 |               | 0.839        | 2.325   | 3.110(3) | 156       | 1-x,1-y,-z               |
| O32-H32B...Cl4 |               | 0.84         | 2.58    | 3.319(3) | 147       | 1+x,y,z                  |
| C5-H5...Cl1    |               | 0.95         | 2.79    | 3.725(4) | 167       | -x,-y,1-z                |
| C6-H6...Cl4    |               | 0.95         | 2.57    | 3.495(4) | 164       | -x,-y,1-z                |
| C7-H7...Cl2    |               | 0.95         | 2.74    | 3.535(5) | 142       | x, y,x                   |

|          |                |      |      |           |     |             |
|----------|----------------|------|------|-----------|-----|-------------|
|          | C8-H8...Cl3    | 0.95 | 2.71 | 3.619(4)  | 159 | x, y, z     |
|          | C10-H10...Cl3  | 0.95 | 2.77 | 3.715(4)  | 172 | 1-x,-y,1-z  |
|          | C15-H15...Cl5  | 0.95 | 2.74 | 3.529(4)  | 141 | 1-x,1-y,1-z |
|          | C12-H12...O31  | 0.95 | 2.50 | 3.033(5)  | 116 | x,y,1+z     |
|          | C16-H16...O31  | 0.95 | 2.55 | 3.276(6)  | 133 | 1-x,1-y,1-z |
| <b>3</b> | N1-H1'...Cl1   | 0.84 | 2.52 | 3.344(10) | 169 | -x,-y,1-z   |
|          | N(3)-H3'...O32 | 0.84 | 1.88 | 2.680(14) | 160 | -1+x,-1+y,z |
|          | N4-H4'...Cl1   | 0.84 | 2.46 | 3.211(10) | 149 | 1+x,y,1+z   |
|          | N4-H4'...Cl2   | 0.84 | 2.79 | 3.438(11) | 135 | 1+x,y,1+z   |
|          | N5-H5'...Cl3   | 0.84 | 2.39 | 3.187(10) | 159 | 1-x,1-y,1-z |
|          | O3- H31A...Cl5 | 0.83 | 2.40 | 3.230(11) | 170 | -x,1-y,-z   |
|          | O31-H31B...Cl2 | 0.84 | 2.65 | 3.439(11) | 158 | x, y, z     |
|          | O32-H32B...Cl4 | 0.84 | 2.60 | 3.366(8)  | 153 | 1-x,1-y,-z  |
|          | O32-H32B...Cl4 | 0.84 | 2.60 | 3.366(8)  | 153 | 1+x,y,z     |
|          | C6-H6...Cl4    | 0.95 | 2.59 | 3.522(14) | 166 | x,-1+y,z    |
|          | C7-H7...Cl2    | 0.95 | 2.74 | 3.528(14) | 141 | x, y, z     |
|          | C8 -H(8)...Cl3 | 0.95 | 2.75 | 3.647(13) | 158 | x, y z      |
|          | C10-H10...Cl3  | 0.95 | 2.77 | 3.715(13) | 172 | 1-x,-y,1-z  |
|          | C15-H15...Cl5  | 0.95 | 2.75 | 3.542(13) | 142 | 1-x,1-y,1-z |
|          | C12-H12...O31  | 0.95 | 2.51 | 3.036(17) | 115 | x,y,1+z     |

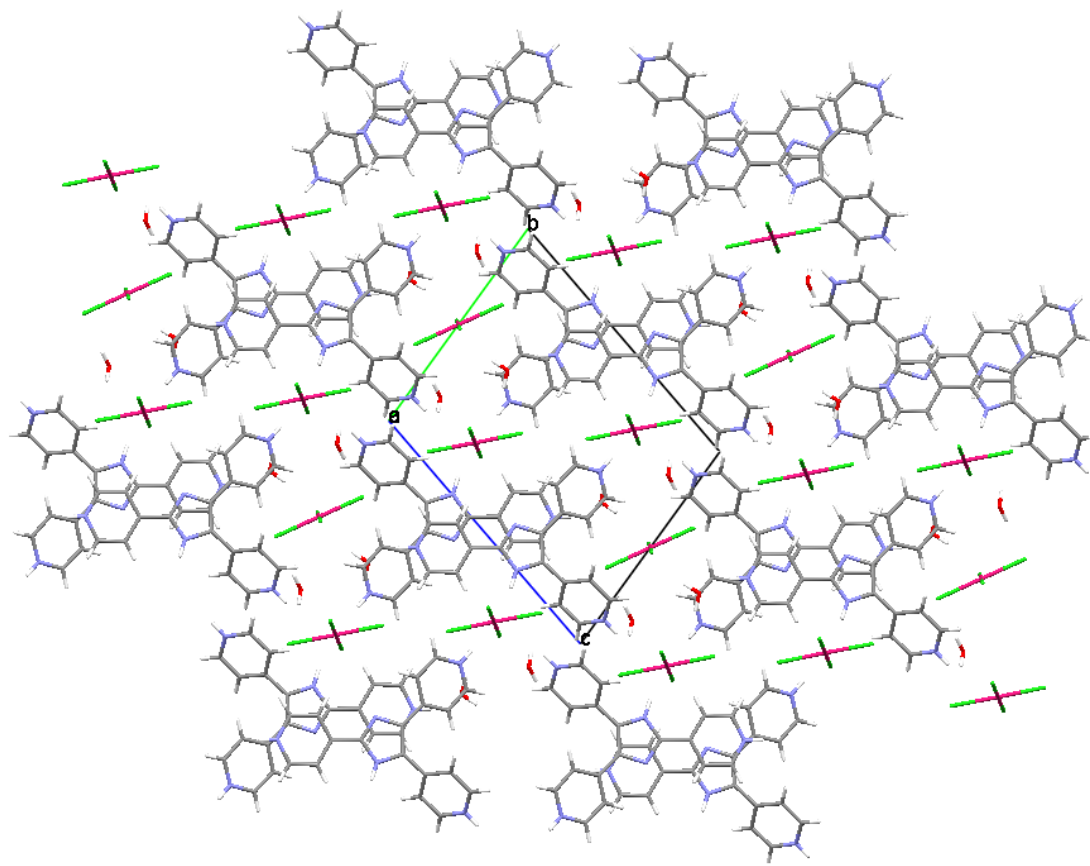

**Fig. S4** View of the 3D supramolecular network in **2** and **3**, constructed by C-H...ClPt and N-H...ClPt hydrogen-bonded interactions. All interactions are omitted for clarity.

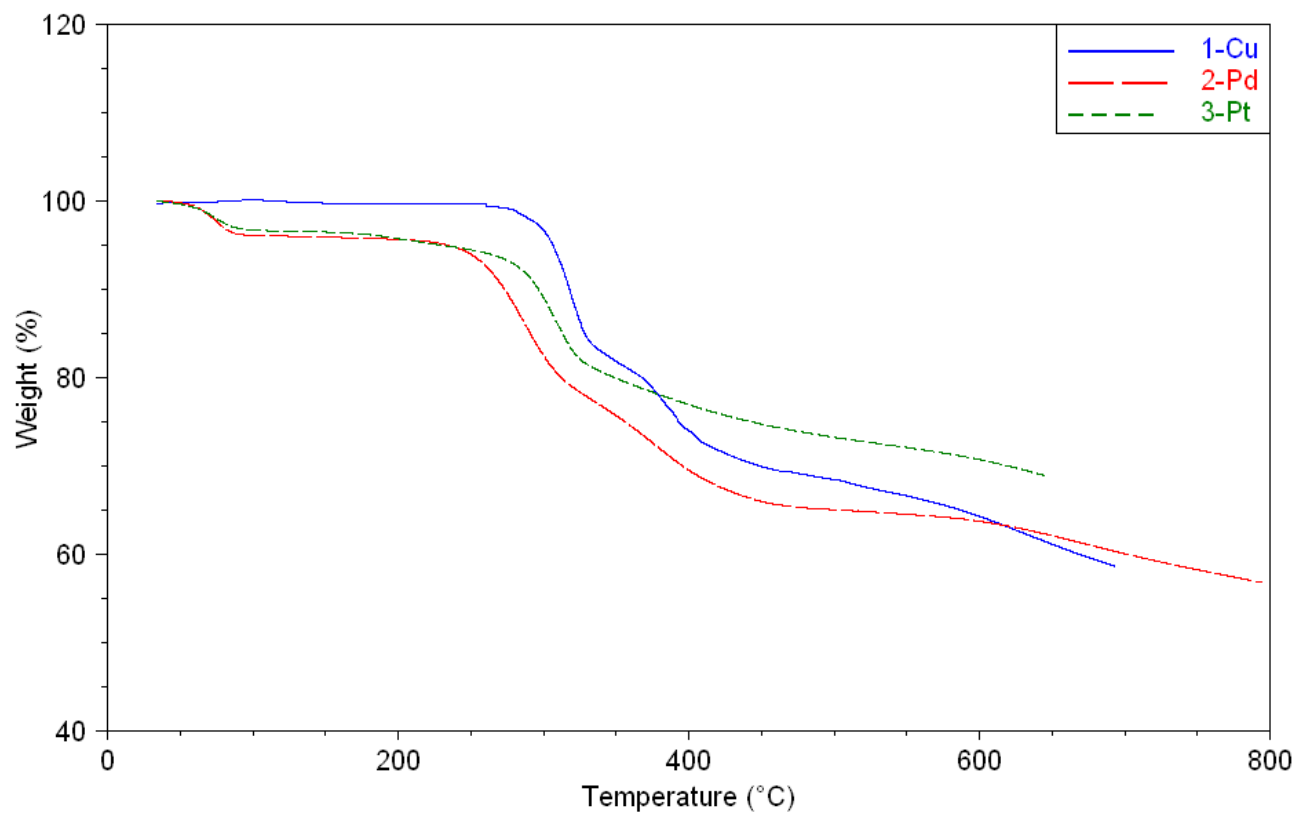

**Fig. S5** TGA graphs of compounds 1-3
